# Supplementary material
Source: Springer Nature journal article supplement (https://www.springermedizin.de/resource/supplementary/12911_2010_382_MOESM1_ESM.pdf/9525710)

**EHR  
Division**

ICPC2  
Chapter **H**  
Ear: ear  
pain, acute  
otitis  
media, etc.

ICPC2  
Chapter **P**  
Psychologi-  
cal: drug,  
medication,  
etc. abuse

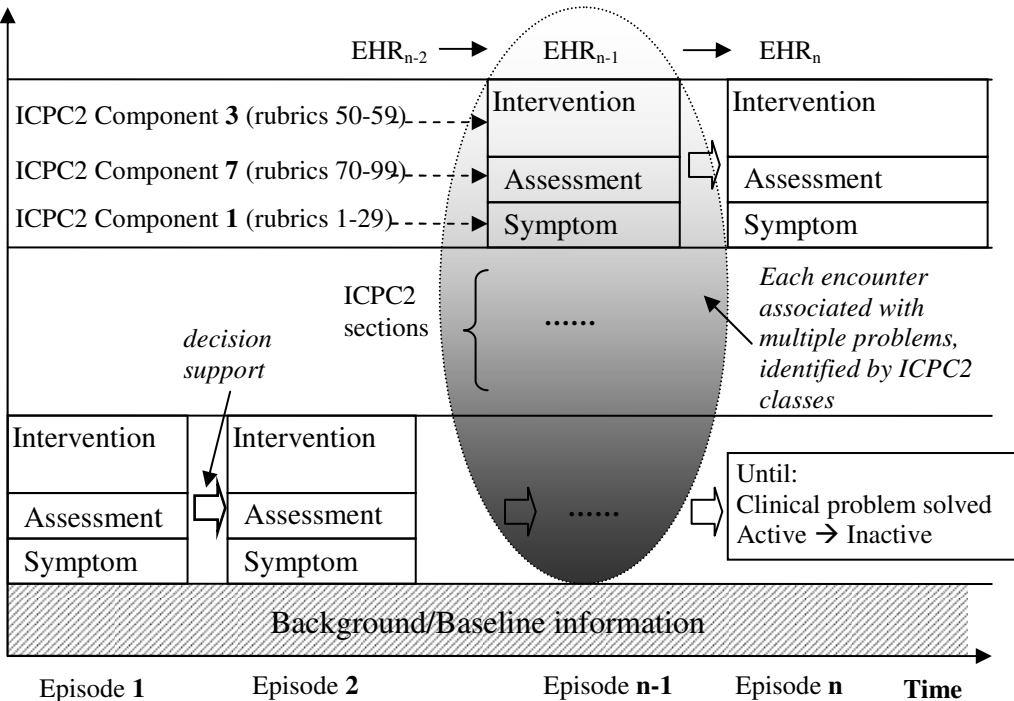

Supplement: MOESM1 [file 9525710]
